# Supplementary material
Source: PubMed Central journal article supplement (PMC4825145)
Supplement: supp_pp.15.01853_01853figs.pdf [file supp_pp.15.01853_01853figs.pdf]

**E**



**Supplemental Figure 1. Complementation of the *cbs1-1* mutant with *p35S::CBS1* or *pCBS1::MtCBS1-GFP* constructs via *Agrobacterium rhizogenes*-mediated hairy root transformation.** Stereomicroscope images under light (left hand side) and fluorescent illumination (right hand side). A and C, empty vector control, B, complementation with *p35S::CBS1* D, complementation with *pCBS1::CBS1-GFP*, E, Acetylene reduction activity at 28 dpi of *cbs1-1* transformed with empty vector, *p35S::CBS1*, or *pCBS1::CBS1-GFP*, N= number of replicates, Bars = 1 mm.



**B**



**C**



**A****B**



R108

*cbs1-1*
